# Supplementary material for: Changes in MDA5 and TLR3 Sensing of the Same Diabetogenic Virus Result in Different Autoimmune Disease Outcomes
Source: PubMed Central journal article supplement (PMC8602094; doi:10.3389/fimmu.2021.751341), 2021-11-05
Supplement: Image_1.pdf [file Image_1.pdf]

Figure S1

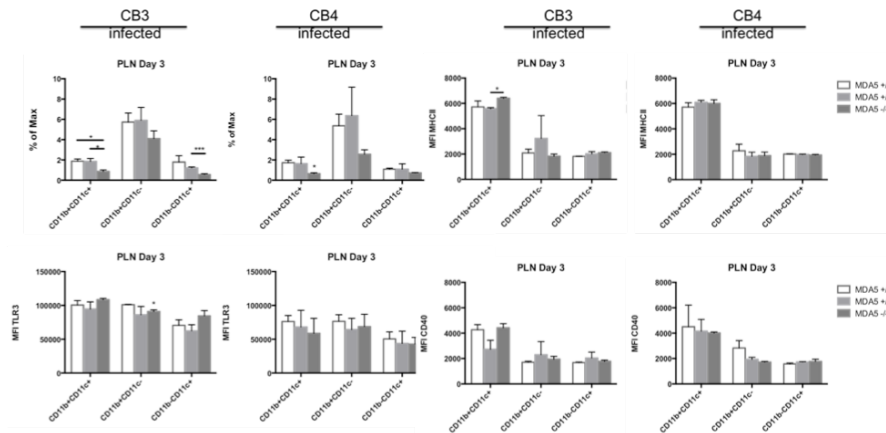

Figure S1. Antigen presenting cell activation and responses in MDA5<sup>-/-</sup> and MDA5<sup>+/-</sup> mice post-CB3 and CB4 infection.
