# Supplementary material for: Changes in MDA5 and TLR3 Sensing of the Same Diabetogenic Virus Result in Different Autoimmune Disease Outcomes
Source: PubMed Central journal article supplement (PMC8602094; doi:10.3389/fimmu.2021.751341), 2021-11-05
Supplement: Image_2.pdf [file Image_2.pdf]

Figure S2

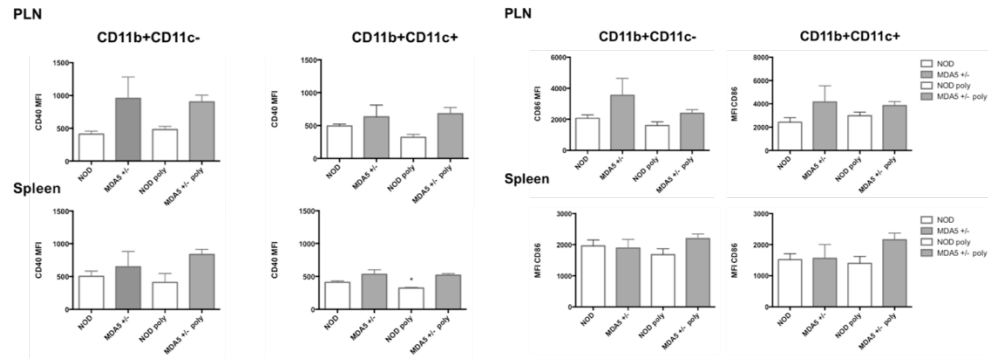

Figure S2. Antigen presenting cell activation in MDA5<sup>+/-</sup> and MDA5<sup>+/+</sup> mice after poly I:C stimulation and CB4 infection.
