# Supplementary material for: Changes in MDA5 and TLR3 Sensing of the Same Diabetogenic Virus Result in Different Autoimmune Disease Outcomes
Source: PubMed Central journal article supplement (PMC8602094; doi:10.3389/fimmu.2021.751341), 2021-11-05
Supplement: Table_1.pdf [file Table_1.pdf]

Table S1. Immunofluorescent staining.

| <b>Location</b>      | <b>Marker</b> | <b>mAB</b>          |
|----------------------|---------------|---------------------|
| <b>Surface</b>       | CD4           | Clone L3T4          |
|                      | CD8           | 53-6.7              |
|                      | C25           | Clone PC61          |
|                      | CD11b         | Clone M1/70         |
|                      | CD11c         | Clone HL3           |
|                      | CD44          | Clone IM7           |
|                      | CD40          | Clone 3/23          |
|                      | CD62L         | Clone MEL-14        |
|                      | CD80          | Clone 16-10A1       |
|                      | CD86          | Clone GL1           |
| <b>Intracellular</b> | Foxp3         | Clone FJK-16s       |
|                      | Helios        | Clone 22F6          |
|                      | TLR3          | Clone 40C1285.6     |
|                      | MDA5          | Abcam ab69983       |
|                      | IFN- $\gamma$ | XMG1.2              |
|                      | IL-17         | Clone TC11- 18H10.1 |
