# Supplementary material for: Changes in MDA5 and TLR3 Sensing of the Same Diabetogenic Virus Result in Different Autoimmune Disease Outcomes
Source: PubMed Central journal article supplement (PMC8602094; doi:10.3389/fimmu.2021.751341), 2021-11-05
Supplement: Table_2.pdf [file Table_2.pdf]

Table S2. Reverse transcription and quantitative real-time PCR primers

| <b>Mouse Gene Target</b>               | <b>Sequence</b>                    |
|----------------------------------------|------------------------------------|
| <b>MDA5 forward</b>                    | 5'- GTGATGACGAGGCCAGCAGTTG-3'      |
| <b>MDA5 reverse</b>                    | 5'- ATTCATCCGTTTCGTCCAGTTCA-3'     |
| <b>IFN-<math>\beta</math> forward</b>  | 5'- GCACTGGGTGGAATGAGACTATTG-3'    |
| <b>IFN-<math>\beta</math> reverse</b>  | 5'- TTCTGAGGCATCAACTGACAGGTC-3'    |
| <b>IFN-<math>\alpha</math> forward</b> | 5'- TGATGAGCTACTGGTCAGC-3'         |
| <b>IFN-<math>\alpha</math> reverse</b> | 5'- GATCTCTTAGCACAAGGATGGC-3'      |
| <b>TLR3 forward</b>                    | 5'- GAGAGAGATTCTGGATGCTTGTGTTTG-3' |
| <b>TLR3 reverse</b>                    | 5'- TGTAGACCATGTAGTTGAGGTCA-3'     |
| <b>GAPDH forward</b>                   | 5'- AGGTCGGTGTGAACGGATTTG-3'       |
| <b>GAPDH reverse</b>                   | 5'- TGTAGACCATGTAGTTGAGGTCA-3'     |
